# Supplementary material for: SAM transmethylation pathway and adenosine recycling to ATP are essential for systemic regulation and immune response
Source: eLife. 2025 Apr 7;13:RP105039. doi: 10.7554/eLife.105039 (PMC11975374; doi:10.7554/eLife.105039)
Supplement: Figure 2—figure supplement 1—source data 1. [file elife-105039-fig2-figsupp1-data1.xlsx]

## Sheet: Fig2-S1
PANEL
F2S1A		Uninf					INF
	SamS	0.438556	0.514354	0.365388	0.528814	0.60186	0.241624	0.216259	0.23556	0.247271	0.18354
	SamDC	0.132816	0.131898	0.103247	0.13374	0.177288	0.081381	0.07989	0.076636	0.073684	0.082899
	Ahcy	0.903857		0.970971	0.991373	1.14936	0.214765	0.599085	0.511983	0.497982	0.552546
	AhcyL1	0.143008	0.109134	0.103485	0.133431	0.144336	0.183116	0.1887	0.194454	0.165416	0.171645
	Cbs	0.052223	0.089467	0.075581	0.045149	0.065797	0.034614	0.029994	0.024932	0.02528	0.023972
	CG10621	0.425579	1.12831	0.608853	1.05032	1.13092	0.1277	0.11509	0.186533	0.114824	0.050913
	CG10623	0.188265	0.160892	0.130083	0.152918	0.174041	0.054315	0.039033	0.030695	0.038943	0.034614
F2S1B	control			Ahcy-RNAi
	0 h	18 h Uninf	18 h INF	0 h	18 h Uninf	18 h INF
	0.736794	0.747079	0.53317	0.264132	0.063343	0.013754
	1.25064	1.02764	0.574084	0.177924	0.084749	0.029688
	1.28878	0.866137	0.530712	0.1193	0.022603	0.022241
	1.0229	0.757508	0.478304	0.126394	0.095568	0.012686
	0.823211	0.9071	0.45882	0.126979	0.043365	0.017012
