# Supplementary material for: SAM transmethylation pathway and adenosine recycling to ATP are essential for systemic regulation and immune response
Source: eLife. 2025 Apr 7;13:RP105039. doi: 10.7554/eLife.105039 (PMC11975374; doi:10.7554/eLife.105039)
Supplement: Figure 2—figure supplement 3—source data 1. [file elife-105039-fig2-figsupp3-data1.xlsx]

## Sheet: Fig2-S3
																																							Mean of 9 h Uninf	Mean of 9 h INF	Difference	SE of difference				Mean of 18 h Uninf	Mean of 18 h INF	Difference	SE of difference
	gene	0 h						9 h Uninf						9 h INF						18 h Uninf						18 h INF											gene	P value					t ratio		P value
	ham *	4.62	4.64	4.57	2.95	5.27	5.04	4.23	1.81	5.67	3.49	7.86	3.22	25.88	13.21	21.13	15.41	17.31	18.26	5.28	3.85	3.34	4.23	2.23	11.39	26.04	13.59	17.96	16.8	17.93	15.16	8.16	22.67	22.73	13.05		ham *	3.8e-05	4.38	18.53	-14.15	2.024	6.992		0.000163	5.053	17.41	-12.36	2.425
	CG9932	3.64	5.13	4.95	3.64	8.8	5.17	3.74	3.98	5.07	5.86	6.97	5.22	16.9	23.53	28.76	27.33	27.2	26.71	7.64	4.9	4.39	4.17	3.41	22.76	16.41	23.86	38.7	36.1	38.3	9.47	15.18	34.43	14.81	23.71		CG9932	<0.000001	5.14	25.07	-19.93	1.846	10.8		0.004584	7.878	25.1	-17.22	5.11
	CG10947 *	1.12	1.02	0.81	1.2	2.06	1.73	0.86	1.06	1.1	1.21	1.56	0.8	2.05	5.13	5.5	5.07	4.17	4.32	0.93	0.84	1.66	1.11	1.42	5	1.77	6.7	8.99	8.6	7.62	1.62	2.59	7.59	1.55	4.81		CG10947 *	9.1e-05	1.098	4.373	-3.275	0.521	6.286		0.027095	1.827	5.184	-3.357	1.36
	rgr	1.2	1.17	0.8	0.93	1.17	0.74	0.56	1.51	1.27	0.99	1.39	0.93	2.09	6.83	5.02	5.18	5.08	5.13	1.54	1.43	0.94	0.61	0.76	1.02	1.35	3.9	4.73	4.81	4.43	1.35	0.64	1.75	1.76	1.96		rgr	0.000156	1.108	4.888	-3.78	0.6432	5.877		0.030964	1.05	2.668	-1.618	0.6746
	CG6379 *	4.09	5.15	5.14	4.19	4.95	6.85	4.93	5.99	10.39	5.21	4.33	4.74	8.81	13.02	18.51	12.57	8.36	9.72	5.56	4.72	4.5	4.88	3.77	5.67	9.46	14.59	16.3	14.6	13.95	6.86	5.49	10.69	14.41	7.74		CG6379 *	0.008413	5.932	11.83	-5.9	1.804	3.271		0.001125	4.85	11.41	-6.559	1.608
	E(var)3-9	1.29	2.08	2.26	1.33	3.44	1.08	2.02	2.93	2.11	1.51	1.39	1.76	1.97	3.66	2.99	3.6	4.02	2.42	2.95	1.28	2.01	0.92	1.38	1.79	4.36	5.59	5.99	2.94	5.08	1.56	1.37	3.17	6.04	1.98		E(var)3-9	0.0152	1.953	3.11	-1.157	0.3956	2.924		0.019562	1.722	3.808	-2.086	0.7915
	ash2	6.04	9.13	8.86	4.37	9.98	6.65	3.89	7.69	10.97	9.21	8.28	5.46	12.73	18.67	17.83	17.93	14.08	15.04	11.22	4.64	4.96	5.99	4.76	9.36	13.98	15.64	15.91	17.86	21.46	8.55	7.44	15.86	14.5	13.9		ash2	0.000156	7.583	16.05	-8.463	1.441	5.875		0.001206	6.822	14.51	-7.688	1.901
	CG30020	1.71	2.85	2.34	1.02	3.29	2.03	2.57	1.16	4.18	2.56	3.36	1.75	4.84	5.06	5.29	6.02	4.19	4.79	2.86	1.96	1.78	2.05	1.02	2.99	5.18	5.37	4.2	6.41	4.71	3.3	2.43	4.41	3.68	3.8		CG30020	0.000724	2.597	5.032	-2.435	0.5073	4.8		0.000754	2.11	4.349	-2.239	0.5224
	CG14906	100.75	86.54	112.29	95.55	74.35	138.89	70.39	33.29	55.05	79.57	76.83	58	154.35	137.54	236.21	170.84	174.86	150.33	92.72	54.82	42.39	60.5	39.47	121.67	129.58	144.74	172.96	150.07	153.29	74.81	109.56	210.39	106.67	124.79		CG14906	4.6e-05	62.19	170.7	-108.5	15.89	6.827		0.002282	68.6	137.7	-69.09	18.57
	Mt2	2.74	2.07	4.34	2.38	4.8	3.86	2.7	0.84	1.75	2.41	3.84	2.13	3.49	2.95	5.41	2.92	5.07	4.36	1.83	1.46	1.74	1.58	0.63	0.92	3.05	2.36	2.62	3.22	2.96	2.84	1.6	5.61	1.11	2.41		Mt2	0.015131	2.278	4.033	-1.755	0.5997	2.927		0.015715	1.36	2.778	-1.418	0.5161
	Sbf	1.79	1.93	1.84	1.01	2.38	1.78	1.29	1.11	4.7	1.76	2.09	1.4	2.73	5.06	4.6	5.8	4.24	3.87	2.08	1.96	1.73	1.65	0.86	1.81	3.83	3.12	5.34	4.76	4.27	1.57	1.76	3.6	2.6	3.32		Sbf	0.007467	2.058	4.383	-2.325	0.6957	3.342		0.004991	1.682	3.417	-1.735	0.5217
	Su(z)12	4.46	5.17	7.74	4.88	9	7.97	5.24	6.39	9.94	6.43	7.72	4.9	6.17	9.32	13.84	16.3	10.3	9.77	7.35	6.26	3.8	5.35	1.59	6.45	9.26	10.5	11.57	12.18	13.37	7.43	6.64	12.49	8.07	6.84		Su(z)12	0.02944	6.77	10.95	-4.18	1.647	2.538		0.001846	5.133	9.835	-4.702	1.228
	PR-Set7 *	4.55	9.67	4.74	5.8	11.93	6.45	5.25	6.49	10.19	11.41	7.82	5.89	8.32	13.29	14.73	14.89	9.22	8.49	6.85	5.79	6.55	5.24	3.93	7.27	10.02	12.16	14.06	18.71	16.53	5.75	6.94	13.1	9.96	9.69		PR-Set7 *	0.049611	7.842	11.49	-3.648	1.634	2.233		0.004848	5.938	11.69	-5.754	1.722
	CG3793 *	10.8	11.48	13.83	8.14	13.12	8.44	10.53	8.35	18.11	5.06	9.12	7.87	17.12	19.92	20.19	22.1	19.26	18.47	11.62	8.95	6.04	12.75	9.5	10.18	15.92	28.53	22.63	24.14	21.46	10.16	9.61	18.09	20.09	18.17		CG3793 *	0.000543	9.84	19.51	-9.67	1.937	4.993		0.003251	9.84	18.88	-9.04	2.552
	CG12128	8.15	10	11.93	7.32	9.78	11	9.33	4.44	14.11	8.71	11.65	6.24	14.67	16.79	15.32	18.08	16.25	18.04	9.85	7.91	5.7	8.99	5.86	9.82	18.78	21.24	17.56	18.86	15.52	8.91	7.93	15.76	12.18	13.58		CG12128	0.000698	9.08	16.53	-7.445	1.543	4.824		0.002456	8.022	15.03	-7.01	1.903
	CG34195 *	4.9	6.1	7.35	4.27	6.72	6.53	5.2	3.89	4.9	6.71	5.42	4.19	6.41	8.45	9.97	8.16	7.96	9.76	6.57	4.6	4.12	5.1	3.24	4.17	8.25	9.52	12.64	7.72	7.28	6.51	6.72	10.15	9.23	5.9		CG34195 *	0.000491	5.052	8.452	-3.4	0.6717	5.062		0.001047	4.633	8.392	-3.759	0.9129
	ste14 (Icmt) *	19.49	23.81	17.87	18.39	13.32	20.38	15.96	20.36	28.39	15.04	24.4	14.41	24.49	35.44	28.8	35.05	29.82	27.56	15.6	19.67	19.78	14.74	11.1	18.13	31.45	39.63	48.93	40.09	43.02	16.8	14.25	27.31	16.97	30.49		ste14 (Icmt) *	0.004986	19.76	30.19	-10.43	2.912	3.583		0.013784	16.5	30.89	-14.39	5.113
	CG9960 (HemK2) *	5.33	6.63	5.8	3.9	6.1	3.53	4.54	2.84	8.36	5.34	6.55	3.91	9.82	9.23	12.57	8.4	5.74	6.14	5.94	4.45	3.99	4.91	3.86	6.44	11.05	12.29	8.73	9.11	11.74	6.07	5.78	11.77	3.24	8.61		CG9960 (HemK2) *	0.026815	5.257	8.65	-3.393	1.309	2.593		0.009178	4.932	8.839	-3.907	1.294
	Hen1	3.23	3.58	3.66	2.35	6.69	4.42	3.15	2.54	5.67	3.51	4.06	2.81	4.3	7.82	6.77	6.93	5.82	7.21	4.28	2.8	2.78	2.76	1.58	4.65	5.48	6.29	6.97	7.95	7.14	2.95	3.38	6.89	2.74	5.22		Hen1	0.002022	3.623	6.475	-2.852	0.6893	4.137		0.015495	3.142	5.501	-2.359	0.8564
	nito	6.95	8.91	7.9	6.91	14.56	9.57	6.84	5.6	13.38	8.37	9.33	8.09	13.37	17.49	20.8	20.56	17.19	16.45	10.78	9.27	6.18	6.95	5.23	10.56	13.7	16.73	19.89	17.21	18.72	8.64	8.22	17.16	10.9	12.06		nito	0.000185	8.602	17.64	-9.042	1.572	5.75		0.005656	8.162	14.32	-6.161	1.888
	Set2 *	1.99	3.19	2.27	2.32	4.41	2.67	2.07	1.7	3.68	2.71	2.8	2.6	3.37	4.23	4.75	4.6	3.73	3.52	3.48	2.33	1.95	1.6	1.67	2.58	3.5	3.95	4.85	6.78	4.34	3.44	1.97	5.43	2.62	2.95		Set2 *	0.002711	2.593	4.033	-1.44	0.3641	3.954		0.016412	2.268	3.983	-1.715	0.6291
	Art1 *	30.62	22.96	36.15	21.82	22.54	35.9	34.98	22.65	25.52	23.2	37.06	18.35	39.83	41.65	40.94	47.1	32.68	33.13	36.28	17.49	17.64	19.52	16.26	19.84	42.98	58.16	40.26	41.22	34.58	25.22	14.76	39.16	49.36	21.42		Art1 *	0.008688	26.96	39.22	-12.26	3.77	3.252		0.019798	21.17	36.71	-15.54	5.91
	CG8067 *	5.37	7.44	6.37	4.18	7.64	6.41	4.94	4.01	9.35	5.08	5.96	3.66	7.64	9.58	12.94	10.01	9.78	12	7.25	5.19	4.1	6.45	3.76	6.69	7.69	14.61	12.11	11.71	12.17	6.11	5.02	11.27	8.11	8.71		CG8067 *	0.001729	5.5	10.33	-4.825	1.139	4.235		0.007812	5.573	9.751	-4.178	1.347
	Nsun5 *	7.55	6.83	7.56	7.31	6.8	7.74	6.63	5.71	8.34	5.22	7.62	4.59	14.95	8.93	10.97	10.05	10.64	10.01	7.04	5.18	3.91	9.01	6.11	8.82	13.23	12.13	13.1	13.27	11.47	8.77	8.94	12.21	11.77	9.47		Nsun5 *	0.00132	6.352	10.93	-4.573	1.038	4.407		0.000206	6.678	11.44	-4.758	0.9575
	gpp *	3.72	4.56	4.81	3.29	6.28	5.58	3.44	2.79	7.08	5.16	6.83	3.89	7.63	11.18	11.71	11.62	11.3	9.81	6.45	4.1	4.04	4.23	3.22	7.47	7.61	7.57	10.64	11.73	13.03	5.19	4.88	10.71	6.12	7.49		gpp *	0.000171	4.865	10.54	-5.677	0.9775	5.807		0.014508	4.918	8.497	-3.579	1.283
	CG9154 *	49.6	48.77	57.53	43.04	43.21	59.17	43.44	23.93	45.38	41.21	47.43	35.5	75.13	49.58	69.86	59.16	70.66	87.85	39.7	34.22	30.72	44.22	27.02	58.47	78.46	89.74	65.65	58.98	69.73	42.63	42.14	71.27	74.95	52.33		CG9154 *	0.001078	39.48	68.71	-29.23	6.44	4.538		0.003628	39.06	64.59	-25.53	7.321
	CG11596 *	6.59	9.6	8.74	6.37	10.46	6.67	6.63	5.93	10.61	6.04	8.56	7.27	12.87	15.63	16.18	21.11	14.25	10.61	9.65	5.72	5.41	8.07	4.58	9.85	11.89	10.91	15.3	15.21	13.85	6.68	6.52	14.01	14.17	11.68		CG11596 *	0.000886	7.507	15.11	-7.602	1.629	4.666		0.006504	7.213	12.02	-4.809	1.506
	Rtf1	4.91	8.12	5.14	3.95	13.36	6.71	4.11	4.61	10.11	8.01	6.49	4.94	11.77	12.16	13.46	17.85	17.17	12.49	7.8	5.11	3.69	6.88	3.82	11.68	9.25	6.96	10.96	17.5	10.78	9.03	6.81	11.99	10.74	10.4		Rtf1	0.00031	6.378	14.15	-7.772	1.445	5.38		0.023766	6.497	10.44	-3.945	1.556
	Smyd5 *	7.21	10.13	11.13	9.7	14.93	9.86	9.4	4.27	10.68	8.33	10.22	4.45	10.33	11.88	12.33	15.46	13.34	13.36	9.8	7.3	4.93	4.82	5.38	8.93	11.5	14.21	15.34	12.45	15.44	8.73	7.8	12.9	6.8	7.7		Smyd5 *	0.004869	7.892	12.78	-4.892	1.36	3.597		0.011309	6.86	11.29	-4.427	1.519
	Rcd5	11.06	14.76	9.99	8.73	24.7	15.5	10.08	7.41	18.96	13.63	12.07	10.79	12.34	24.28	24.76	20.73	20.91	25.55	16	12.23	9.09	9.28	5.8	14.71	20.44	20.18	22.21	20.23	22.41	15.76	10.73	31.04	7.67	13.63		Rcd5	0.004686	12.16	21.43	-9.272	2.561	3.62		0.030871	11.19	18.43	-7.245	3.019
	ear	5.98	10.14	8.91	5.88	14.77	12.04	6.25	5.64	18.2	9.9	10.33	8.15	18.4	18.13	20.31	20.11	18.54	18.43	12.55	8.35	6.31	9.17	7.71	12.33	13.32	14.98	18.59	21.76	19.84	11.82	7.15	20.49	13.11	11.33		ear	0.000652	9.745	18.99	-9.242	1.898	4.869		0.015437	9.403	15.24	-5.836	2.117
	CG5339 *	11.81	15.07	12.79	8.25	14.45	10.49	12.12	8.53	16.28	10.98	13.06	8.5	15.1	18.71	24.01	17.63	17.07	22.25	15.35	11	6.8	7.42	7.25	10.6	16.69	23.66	16.41	20.37	15.04	10.12	10.81	17.99	10.31	13.42		CG5339 *	0.002039	11.58	19.13	-7.55	1.827	4.132		0.016773	9.737	15.48	-5.745	2.117
	aft *	16.46	15.89	15.57	15.1	18.79	19.61	15.33	10.43	20.12	14.71	19.39	11.91	16.94	25.25	27.42	26.81	24.15	26.08	12.15	13.31	12.48	12.47	10.39	14.89	21.52	27.31	22.92	28.24	19	16.88	10.46	23.91	14.31	15.95		aft *	0.002194	15.32	24.44	-9.127	2.234	4.086		0.008387	12.62	20.05	-7.435	2.425
	CG3570 (Samtor)*	9.34	8.27	7.32	6.89	13.49	10.93	6.54	4.8	10.96	9.97	10.68	5.82	9.77	11.22	11.86	14.73	11.97	9.76	7.67	8.83	6.38	6.1	3.34	6.43	15.67	11.57	11.55	9.64	7.83	10.25	3.78	12.23	10.17	7.73		CG3570 (Samtor)*	0.028455	8.128	11.55	-3.423	1.338	2.558		0.025362	6.458	10.04	-3.584	1.432
	CG14618	23.94	28.13	37.12	22.79	26.3	32.16	31.24	16.78	30.85	23.69	38.51	24.43	26.22	49.77	47.4	53.43	45.85	48.23	44.46	20.76	21.62	30.76	18.72	31.65	37.79	53.95	51.25	59.7	53.11	22.12	38.85	55.75	28.02	31.64		CG14618	0.005568	27.58	45.15	-17.57	4.995	3.517		0.028344	28	43.22	-15.22	6.228
	CG2614 *	5.79	7.33	7.57	6.81	6.47	9.35	8.13	3.95	9.51	7.08	9.66	7.45	9.57	14.05	12.93	12.6	12.12	10.25	10.85	6.97	6.24	6.27	6.73	8.04	12.28	12	15.53	12.28	13.11	9.63	6.46	15.5	8.64	11.92		CG2614 *	0.002923	7.63	11.92	-4.29	1.098	3.908		0.005822	7.517	11.74	-4.218	1.298
	CG9249 (Coq3) *	16.89	15.67	14.12	11.92	15.94	15.31	16.5	10.4	13.52	11.68	16.9	12.73	14.47	16.08	18.41	18.41	15.18	19.05	9.91	9.67	9.81	11.91	8.98	13.44	18.18	16.54	16.49	14.2	17.13	13	12.08	24.05	19.79	11.66		CG9249 (Coq3) *	0.031519	13.62	16.93	-3.312	1.325	2.499		0.004158	10.62	16.31	-5.692	1.665
	wds	33.29	58.26	48.44	29.88	62.98	60.79	33.18	25.32	46.58	51.73	50.25	38.78	57.03	53.62	85.06	74.62	59.28	59.78	48.07	31.19	27.34	30.97	24.23	51.83	68.91	48.52	71.87	57.31	67.9	35.58	29.3	68.88	46.91	44.77		wds	0.00449	40.97	64.9	-23.93	6.562	3.646		0.023304	35.61	54	-18.39	7.224
	wuho	35.36	43.98	35.11	30.12	30.41	33.95	34.43	30.6	37.95	30.57	39.85	28.5	54.95	53.75	63.43	57.65	49.41	48.14	39.58	35.45	28.82	30.49	23.93	29.92	49.17	70.29	59.42	49.8	47.85	33.64	30.24	57.28	40.53	41.9		wuho	3.3e-05	33.65	54.56	-20.91	2.942	7.106		0.007323	31.37	48.01	-16.65	5.312
	G9a *	9.73	12.07	12.76	9.71	16.9	15.9	9.6	7.86	16.47	13.63	16.77	11.39	19.78	21.93	26.07	26.82	20.13	19.07	16.81	8.81	11.94	9.99	9.71	15.79	17.83	14.44	23.38	22.49	28.98	11.37	11.01	24.59	16.47	15.87		G9a *	0.000737	12.62	22.3	-9.68	2.022	4.788		0.03028	12.18	18.64	-6.468	2.684
	upSET	9.21	14.13	11.68	8.35	21.93	12.93	9.38	8.19	18.53	14.81	15.27	10.81	18.12	17.55	20.5	21.07	21.39	19.24	16.92	10.58	12.3	9.63	7.93	16.27	18.13	14.59	21.99	21.52	23.36	12.36	10.73	24.32	13.39	14.66		upSET	0.003065	12.83	19.65	-6.813	1.757	3.879		0.042751	12.27	17.51	-5.233	2.348
	CG32152 *	8.07	9.33	9.39	5.91	12.24	9.89	7.82	7.96	12.31	9.55	12.26	9.12	13.12	22.03	19.39	19.31	20.67	19.85	11.82	10.36	8.61	7.93	7.27	11.6	16.49	14.89	14.13	16.93	19.05	9.82	7.7	17.32	8.11	13.23		CG32152 *	0.000109	9.837	19.06	-9.225	1.502	6.142		0.032829	9.598	13.77	-4.169	1.761
	CG3527 *	9.83	12.17	12.82	9.51	9.94	12.89	10.09	5.87	12.85	10.15	12.68	7.7	16.03	13.88	17.06	23.86	13.2	11.84	12.32	8.01	7.2	10.03	7.52	9.61	17.73	16.78	11.73	12.66	17.76	6.61	9.49	17.2	8.93	11.27		CG3527 *	0.015221	9.89	15.98	-6.088	2.083	2.923		0.047999	9.115	13.02	-3.901	1.8
[truncated: 1 more columns]
