# Supplementary material for: SAM transmethylation pathway and adenosine recycling to ATP are essential for systemic regulation and immune response
Source: eLife. 2025 Apr 7;13:RP105039. doi: 10.7554/eLife.105039 (PMC11975374; doi:10.7554/eLife.105039)
Supplement: Figure 2—source data 1. [file elife-105039-fig2-data1.xlsx]

## Sheet: Fig2
Panel																																							Mean of 9 h Uninf	Mean of 9 h INF	Difference	SE of difference				Mean of 18 h Uninf	Mean of 18 h INF	Difference	SE of difference
2B		0 h						9 h Uninf						9 h INF						18 h Uninf						18 h INF											gene	P value					t ratio		P value
	Sam-S	20.7	14.08	23.18	17.16	20.2	22.2	27.52	12.17	25.93	18.57	24.96	12.57	14.1	14.19	13.55	15.56	19.37	13.82	20.01	13.28	12.93	23.34	16.27	18.16	18.67	15.29	12.7	16.21	16.86	14.93	23.98	20.31	16.95	16.49		Sam-S	0.107706	20.29	15.1	5.188	2.937	1.767		0.959583	17.33	17.24	0.09267	1.796
	SamDC	7.67	10.73	10.18	8.61	11.19	5	8.66	9.11	19.66	6.6	8.34	6.57	12.35	17.46	15.14	20.71	13.69	10.73	9.52	5.38	7.21	9.52	12.56	6.73	16.61	20.65	9.18	23.76	14.13	9.76	9.23	12.84	2.85	17.37		SamDC	0.064595	9.823	15.01	-5.19	2.5	2.076		0.07587	8.487	13.64	-5.151	2.687
	Ahcy	127.41	94.7	138.32	129.84	69.5	132.73	127.98	57.21	67.72	67.42	103.15	71.79	90.76	77.03	88.54	79.49	73.17	79.55	89.27	70.04	57.76	99.1	74.28	65.09	104.32	88.6	75.94	70.6	71.85	69.78	88.81	85.45	73.78	77.67		Ahcy	0.923844	82.55	81.42	1.122	11.44	0.09803		0.483038	75.92	80.68	-4.757	6.601
	AhcyL1	20.18	27.88	13.78	17.47	18.26	21.36	15.77	30.76	21.33	18.7	20.92	15.66	28.8	25.71	31.51	32.9	23.09	16.23	16.57	26.08	23.72	23.66	26.13	19.71	20.76	22.35	31.34	33.18	28.42	22.66	17.51	28.16	19.14	26.18		AhcyL1	0.114831	20.52	26.37	-5.85	3.387	1.727		0.364281	22.65	24.97	-2.325	2.479
	AhcyL2	10.35	4.7	2.04	7.64	0.95	0.87	4.16	3.92	0.36	0.68	5.45	6.74	0.45	1.93	0.45	0	0.85	0.23	1.58	4.79	1.36	5.39	4.51	1.64	1.31	0.32	0.04	0.43	0.06	7.72	8.39	0.27	0.35	8.99		AhcyL2	0.022999	3.552	0.6517	2.9	1.081	2.682		0.807459	3.212	2.788	0.4237	1.706
	Cbs	17.11	9.5	9.77	14.76	7.86	20.2	14.91	10.38	7.34	15.53	9.2	5.64	3.56	2.44	2.75	2.53	2.61	4.48	11.52	10.29	10.92	14.51	10.45	9.77	5.27	2.95	2.23	5.13	1.86	4.78	10.78	5.29	3.11	5.4		Cbs	0.001208	10.5	3.062	7.438	1.666	4.464		6.8e-05	11.24	4.68	6.563	1.176
	Cth	138.25	94.02	129.52	129.81	71.92	104.21	113.57	69.79	100.91	93.44	94.23	82.92	72.96	129.54	130.25	145	113.09	104.68	98.73	84.7	74.57	104	82.32	90.11	87.54	187.75	139.04	101.12	124.86	82.96	98.72	119.14	68.17	105.71		Cth	0.07994	92.48	115.9	-23.44	12.03	1.949		0.143093	89.07	111.5	-22.43	14.46
	CG10621	43.71	22.45	20.35	33.9	51.98	41.7	30.45	22.81	61.31	76.51	71.83	116.21	33.12	52.43	30.94	21.86	32.41	28.53	18.24	83.87	21.51	27.01	103.93	33.61	27.7	22.85	13.79	14.24	47.33	50.63	34.87	20.69	8.01	31.79		CG10621	0.065388	63.19	33.22	29.97	14.49	2.069		0.122976	48.03	27.19	20.84	12.7
	CG10623	18.05	22.36	13.96	13.29	16.84	9.9	13.75	21.03	29.64	12.19	17.58	16.47	5.6	10.91	11.31	11.11	13.42	11.16	12.96	25.1	17.54	15.8	15.84	8.8	5.73	9.76	5.35	10.8	9.15	14.94	7.98	9.61	4.6	11.58		CG10623	0.017971	18.44	10.59	7.858	2.781	2.826		0.005035	16.01	8.95	7.057	2.124
	mnd	20.86	33.02	29.51	15.35	28.79	31.68	22.36	14.21	22.07	23.57	33.74	18.46	46.35	24.76	34.19	28.63	28.45	33.1	32.47	15.57	17.09	18.48	12.99	26.11	49.41	22.34	31.14	27.23	34	29.35	20.45	40.32	42.72	29.68		mnd	0.031676	22.4	32.58	-10.18	4.078	2.496		0.015048	20.45	32.66	-12.21	4.409
	Jhl-21	4.55	6.07	5.1	4.99	5.75	6.87	4.11	3.45	4.01	5.41	8.23	4.03	4.67	6.17	5.71	5.46	6.47	7.7	4.97	4.8	4.22	3.41	2.85	6.14	8.53	4.67	6.33	6.96	5.83	4.12	4.71	7.21	9.86	4.94		Jhl-21	0.195931	4.873	6.03	-1.157	0.8347	1.386		0.040387	4.398	6.316	-1.918	0.849
	CG1607	0.69	0.34	0.45	0.63	1.59	0.93	0.82	1.11	0.33	0.55	0.36	0.2	3.17	2.38	1.72	1.18	2.91	3.05	0.22	0.14	0.44	1.04	1.14	3.42	2.77	2.65	5.56	4.72	2.69	2.23	4.84	5.06	6.82	6.08		CG1607	0.000427	0.5617	2.402	-1.84	0.3568	5.157		0.000852	1.067	4.342	-3.275	0.7757
	sbm	7.64	10.45	6.35	10.15	8.28	5.88	9.88	8.34	3.62	5.36	4.67	8.9	2.03	1.72	1.24	0.87	2	2.4	6.85	8.48	6.86	6.79	10.35	6.21	2.25	0.61	1.41	1.61	1.31	6.61	7.32	1.74	1.69	6.07		sbm	0.000797	6.795	1.71	5.085	1.074	4.736		0.001537	7.59	3.062	4.528	1.155
	gb	24.16	29.63	24.39	15.03	35.97	24.87	19.89	18.8	50.26	23.51	28.53	23.59	27.66	95.96	94.5	94.87	63.51	57.95	35.27	19.53	25.7	22.21	25.92	23.98	32.77	70.33	84.1	68.7	77.27	21.88	21.53	35.28	31.17	29.01		gb	0.004363	27.43	72.41	-44.98	12.28	3.664		0.054411	25.44	47.2	-21.77	10.37
2C	Control		Ahcy-RNAi
	Uninf	INF	Uninf	INF
	64.1	80.4	53.5	74.4
	75.9	92.7	45.5	97.2
	83.6	83.8	42.5	79.9
	64.4	84.7	57.6	71.2
	56.7	86.2	44.2	79.5
		69.4
2D	Control		Ahcy-RNAi
	Uninf	INF	Uninf	INF
	10.14	14.15	2.3	10.42
	7.33	10.69	2.57	8.65
	6.74	23.82	2.45	6.33
	4.2	17.59	1.84	5.88
	4.39	19.46	1.77	5.87
		14.53
2E	Control		Ahcy-RNAi
	Uninf	INF	Uninf	INF
	14.29	24.26	0.94	5.23
	18.17	15.28	0.74	3.21
	15.55	29.77	0.69	1.72
	15.36	29.88	0.6	1.2
	12.84	35.23	0.68	1.37
		19.01
2F	media	Control		Ahcy-RNAi
		Uninf	INF	Uninf	INF
	2.8	1.6	1.6	2.4	1.6
	3	1.3	0.3	2.1	1.4
	2.9	1.3	1.5	3.3	1.1
		1.3	0.9	1.2	1.4
		1.5	1.4	1.8	1.1
			1.8
2G	Control		Ahcy-RNAi
	Uninf	INF	Uninf	INF
	3498790	35940795	235261005	75159969
	89623882	74487022	132630542	139236801
	90855132	77398325	156089305	80509351
	90457070	75932790	169655722	74827316
	17081136	9116062	137902486	122296379
2H	Control		Ahcy-RNAi
	Uninf	INF	Uninf	INF
	34989393	52361060	76332836	82145242
	43679374	68337925	69158693	150504442
	36296753	70522995	90619662	97196891
	41258990	57839832	89037396	93286883
	45506004	53290336	68594437	98846864
2I	Control		Ahcy-RNAi
	Uninf	INF	Uninf	INF
	206985	173826	73485435	56338312
	1824419	332223	54552181	134317367
	736879	330896	69245348	74914891
	1707414	177014	56319229	74255956
	457150	93745	46503285	69112725
2J	Control		Ahcy-RNAi
	Uninf	INF	Uninf	INF
	169	301	1.039	1.458
	24	206	1.268	1.121
	49	213	1.309	1.297
	24	327	1.581	1.256
	100	568	1.475	1.43
2K	Control		Ahcy-RNAi
	Uninf	INF	Uninf	INF
	16.3	20.7	10.6	16.1
	14.3	16.1	11.3	15.5
	14.1	25.7	10	14
	12.3	20.8	11	13
		22.8	11.1	13.2
		18.7
2L	Control		Ahcy-RNAi
	Uninf	INF	Uninf	INF
	9607310	11942551	13402123	17005446
	3778810	11942720	15397642	14668097
	14655250	11712538	12930498	20455640
	10555251	10004310	16185568	27524862
	4598126	10451216	28834202	22935824
2M	Control		Ahcy-RNAi
	Uninf	INF	Uninf	INF
	37.4	34.1	32.5	23.9
	33.3	28.3	27.5	19.8
	38.6	34.9	36.5	25.1
	35.3	25.5	28.5	27.9
	39.1	29.4	30.3	25.8
		14.9
2N	Control		Ahcy-RNAi
	Uninf	INF	Uninf	INF
	1322462	6135883	4279188	4542753
	4237835	7843804	3353563	10501750
	3907492	9164078	4434479	5105928
	3597969	6896656	6474196	4325023
	2758753	3840035	4356927	7558505
[truncated: 1 more columns]
