# Supplementary material for: SAM transmethylation pathway and adenosine recycling to ATP are essential for systemic regulation and immune response
Source: eLife. 2025 Apr 7;13:RP105039. doi: 10.7554/eLife.105039 (PMC11975374; doi:10.7554/eLife.105039)
Supplement: Figure 3—source data 1. [file elife-105039-fig3-data1.xlsx]

## Sheet: Fig3
PANEL
3A	Control		Ahcy-RNAi
	Uninf	INF	Uninf	INF
	577565	39928	68284	287675
	581847	65988	365050	52331
	690618	72171	411425	151431
	396292	22467	201774	124614
		74485	223431	58444
3B	Extracellular Adenosine
	Control		Ahcy-RNAi
	Uninf	INF	Uninf	INF
	55.5386	90.6793	86.4954	25.2868
	58.5821	150.172	23.0996	20.4858
	71.8809	387.291	121.947	28.0058
	73.4726	174.679	21.0305	45.2373
	Extracellular Inosine
	Control		Ahcy-RNAi
	Uninf	INF	Uninf	INF
	83.5935	253.622	210.815	145.241
	94.4117	896.596	97.1037	110.093
	142.155	1410.76	246.491	157.817
	140.47	447.026	95.2374	209.676
3C		Control						Ahcy-RNAi
	h AEL	Uninf			INF			Uninf			INF
	72	0	0	0	0	0	0	0	0	0	0	0	0
	78	0	0	0	0	0	0	0	0	0	0	0	0
	84	0	0	0	0	0	0	0	0	0	0	0	0
	90	0	0	0	0	0	0	0	0	0	0	0	0
	96	0	0	0	0	0	0	0	0	0	0	0	0
	102	0	0	0	0	0	0	0	0	0	0	0	0
	108	0	0	0	0	0	0	0	0	0	0	0	0
	116	0	0	0	0	1	0	0	1	1	0	0	0
	122	6	12	2	0	7	0	28	33	33	11	9	10
	128	62	78	54	12	30	6	69	77	83	40	29	49
	134	86	87	81	32	49	29	94	91	93	65	70	69
	140	96	94	90	63	73	42	94	93	94	79	78	80
	146	97	96	94	81	87	69	94	93	94	87	88	92
	152	97	96	94	92	94	99	94	93	94	91	92	93
3D	control	Ahcy RNAi
	600	0
	600	150
	1200	150
	0	1350
	150	750
	1200	450
	2400	0
	3150	0
	4500	900
	1650	750
	1500	900
	1050	300
	600	1650
	6750	450
	600	600
	0	450
	1800	300
	0	600
	2100	750
	0	150
	750	1800
	3900	1650
	2550	300
	900	150
	5700	600
	1050	0
	4950	5850
	1050	1200
	1200	1650
	1650	300
	4800	0
	1050	0
	1800	1350
	1200	450
	1350	1050
	14700	750
	2850	2400
	6450	3150
	300	450
	900	1350
	600	1650
	1950	1650
	8250	1500
	1650	600
	4350	4500
	0	2700
	8250	750
	1500	2550
	8100	1500
	4350	3750
	6750	1350
	1500	150
	4200	7800
	2100	2550
	4500	6600
	1800	1950
	4650	4650
	5250	3000
	6750	5550
	150	2850
	2100
	0
	5250
	1200
	600
	1950
	8250
	1650
	4350
	0
	8250
	1500
	8100
	4350
	6750
	1500
	5700
	3450
	6600
	5400
	2400
	450
	750
	10800
	450
	3600
	24750
	4050
	8400
	1650
	7500
	2100
	5400
	4050
	10200
	2100
	5700
	3300
	3900
	1050
	5250
	3000
	4950
	5400
	4525
	3300
	2400
	2700
	1800
	9150
	4500
	3150
	4800
	4500
	5250
	8700
	2400
3E	control	Ahcy RNAi
	8.11	0
	8.33	0
	10.81	0
	4.17	4.55
	25	0
	3.33	4.35
	18.75	6.25
	8.57	0
	16	2.78
	24.14	6.06
	11.11	6.45
	10.34	9.09
	19.35	9.38
	12.12	6.06
	10.34	3.23
	7.14
	20.69
	22.22
	23.08
	32
	25.93
