# Supplementary material for: SAM transmethylation pathway and adenosine recycling to ATP are essential for systemic regulation and immune response
Source: eLife. 2025 Apr 7;13:RP105039. doi: 10.7554/eLife.105039 (PMC11975374; doi:10.7554/eLife.105039)
Supplement: Figure 4—source data 1. [file elife-105039-fig4-data1.xlsx]

## Sheet: Fig4
Panel
4B		0 h						9 h Uninf						9 h INF						18 h Uninf						18 h INF
	Adk1	0	0.3	0	0.29	3.83	0.51	0	0	4.87	0.17	0.07	0	0	2.44	0.3	2.21	5.34	1.87	0.81	0.96	0	0	0	0	0	0	0.52	0.46	0.15	0.49	0.37	0.77	0	0.23
	Adk2	55.35	45.17	57.97	49.59	40.83	65.52	69.05	21.07	37.22	29.51	72.69	43.34	48.53	58.92	48.92	43.5	59.32	60.6	49.85	32.51	23.25	43.21	29.47	36.42	42.91	32.7	28.53	25.82	41.99	43.86	43.12	42.03	27.67	29.6
	Adk3	6.64	6.36	4.53	6.51	4.37	7.49	4.67	6.77	6.16	6.6	4.87	7.63	11.87	21.37	31.65	29.25	25.95	33.25	6.85	8.62	5.94	2.72	4.89	24.38	14.45	41.01	45.99	35.98	32.1	9.99	15.71	46.37	10.36	32
	Ak1	17.57	17.58	19.13	20.14	13.04	21.01	23.28	9.78	8.15	15.21	17.3	13.57	9.32	43.67	56.94	54.55	49.13	69.21	19.28	10.83	11.23	23.53	12.53	52.5	14.74	85.39	92.07	75.45	62.44	17.6	50.71	56.7	12.49	49.55
	Ak2	127.23	126.29	129.81	148.99	74.86	97.92	154.44	120.96	111.31	74.72	114.33	93.03	87.37	57.2	56.73	71.38	61.58	65.1	115.11	110.1	78.03	146.51	144.6	72.04	119.28	81.18	64.14	64.71	56.66	102.02	102.1	83.62	59.72	110.01
	Ak3	9.15	9.33	7.35	9.45	14.4	8.42	8.31	9.98	18.92	6.49	6.46	8.84	3.93	13.7	8.89	9.48	12.3	7.23	9.02	11.81	6.25	8.96	10.99	3.59	4.88	6.85	6.87	13.1	6.7	5.59	9.28	6.56	1.73	8.16
	CG15543	0.32	0.65	0.69	0.18	4.05	0.78	0.14	0	7.73	0.59	1.29	0.57	0.75	4.11	0.77	2.98	9.28	8.68	0.86	0.78	0.63	0.35	0	1.01	1.48	0.54	0.5	4.24	0.58	1.32	0.99	4.58	0	2.09
	Ak6	29.66	37.17	40.49	32.4	50.53	42.64	36.81	19.49	26.37	26.77	47.38	29.74	62.36	33.02	43.04	43.5	29.9	39.8	39.77	21.57	22.63	29.19	13.65	28.33	49.38	23.9	34.97	31.51	32.06	25.49	21.72	47.98	42.54	27.3
	ArgK	98.89	132.57	117.59	162.16	201.49	94.31	157.46	234.12	61.72	184.96	73.73	219.59	22.71	8.9	8.18	4.51	10.09	25.25	155.57	154.25	195.9	155.42	252.26	172.92	32.15	4.7	5.95	7.04	4.21	137.49	192.81	22.8	17.49	102.12
	Ent1	1.93	2.55	3.25	2.21	3.43	1.78	1.99	2.39	5.78	1.79	2.18	2.09	4.75	10.5	7.37	6.57	9.02	6.33	3.68	2.33	2.22	3.61	2.15	2.98	3.49	9.6	8.07	8.06	8.45	2.44	2.48	7.4	9.05	2.81
	Ent2	13.9	11.05	15.55	12.92	11.02	10.79	16.88	13.5	18.8	9.59	15.92	8.13	15.8	18.29	17.62	18.48	16.54	12.29	12.73	10.16	11.43	17.4	12.04	11.86	13.42	23.31	21.05	17.44	19.01	13.64	10.99	13.13	15.49	16.41
	Ent3	1.79	0.67	1.02	1.68	1.05	1.13	0.31	2.17	1.52	0.94	0.73	0.17	1.32	2.52	1.7	1.52	3.48	2.21	1.87	0.96	1.93	0.73	0.32	2.48	2.5	1	2.97	4.54	3.79	1.15	1.57	2.46	5.22	1.34
	CNT1	0.86	1.89	1	0.39	2.7	1.54	0.65	0.33	2.31	1.65	1.76	0.92	0.39	2.35	2.4	2.35	3.4	3.3	1.79	1.35	1.04	0.85	0.35	0.78	1.69	2.12	1.64	1.53	2.24	0.88	0.71	2.14	0.54	1.37
	CNT2	12.13	1.22	1.9	5.98	0.4	2.93	1.06	1.07	0.14	1.28	4.11	0.14	0.65	0.21	0.13	0.14	0.63	0.05	0.34	2.02	1.35	5.93	1.07	0.49	0.12	0.05	0.22	0.15	0.35	1.69	0.82	0.43	0	0.81
	Ada	2.01	4.8	4.22	3.77	4.98	2.76	1.64	3.72	5.95	3.22	4.7	2.91	4.26	5.29	7.66	7.11	6.54	5.42	5.13	4.2	4.52	2.77	4.15	5.59	5.28	6.9	11.9	5.4	7.37	3.35	3.45	5.82	3.18	3.13
	Adgf-A	7.6	4.09	3.72	6.09	3.64	6.09	4.04	6.7	5.72	2.63	5.61	1.85	21.06	15.16	15.5	15.32	19.04	19.46	2.74	8.47	7.31	12.69	3.78	13.47	20.74	23.3	25.56	21.67	21.23	14.58	13.39	21.59	18.53	16.5
	Adgf-A2	0.31	0.25	0.22	0.27	1.62	0.18	0.11	0.31	2.83	0.27	0.43	0.16	2.05	3.03	1.54	2.37	3.26	2.28	0.28	0.66	0.27	0.29	0.06	1.58	1.82	2.34	3.93	4.79	3.4	1.43	1.23	3.14	1.78	2.52
	Adgf-B	0	0	0	0.08	0.25	0	0	0	1.67	0	0.16	0	0	0.13	0.35	0.1	0.78	0.38	0	0	0.04	0	0	0.2	0	0	0.09	0	0.26	0	0	0.45	0	0
	Adgf-C	2.47	1.25	1.53	2.95	0.99	1.18	2.69	0.52	1	1.61	0.19	1.84	0	0.79	0.65	0.36	0.18	0.93	1.32	1.29	1.65	2.14	1.6	1.92	1.25	0.14	0.47	0	0.1	1.46	2.84	0.42	0	0.3
	Adgf-D	4.4	1.87	1.87	2.51	1.58	2.37	3.5	1.03	1.88	1.24	2.96	1.74	0.41	6.29	0.69	0.69	2.14	2.19	0.84	1.59	1.06	2.13	2.01	1.54	1.08	2.78	0.28	0.61	0.49	2.17	1.95	0.81	0.07	1.55
	Adgf-E	0	0	0	0.15	1.05	0	0.11	0	3	0	0	0	0	1.75	0.08	1.82	1.39	0.95	0	1.16	0.22	0.07	0	0	0	0	0	0.55	0.23	0	0.37	1.21	0.99	0.09
	Nt5a	12.62	11.98	10.84	10.63	11.32	10.74	11.84	6.64	14.02	7.05	10.25	8.36	10.26	28.49	14.42	15.05	13.71	14.1	8.49	11.38	5.4	10.44	7.34	11.32	9.35	19.53	15.14	16.61	11.39	8.89	11.4	15.69	9.33	11.28
	Nt5b	1.42	1.46	1.65	2	2.1	2.03	1.95	2.09	2.87	1.05	1.29	1.02	1.56	8.77	4.54	3.22	3.93	2.74	1.96	1.78	1.27	1.73	2.31	1.81	2.43	3.29	3.17	3.2	3	2.23	1.98	2.64	3.33	3.04
	Nt5c	16.55	18.5	17.79	15.68	16.4	18.93	14.78	15.83	19.86	18.32	20.7	15.09	22.2	29.08	30.42	31.4	26.71	27.27	17.48	16.28	15.45	16.03	15.47	17.67	24.57	25.07	29.02	25.65	25.44	19.18	13.38	23.58	18.21	18.44
	cN-IIIB	44.4	30.58	23.31	39.51	19.96	43.55	19.78	19.8	15.74	15.55	26.27	15.7	16.22	8.57	12.23	11.41	12.49	14.13	15.52	32.42	20.51	24.17	21.52	14.74	14.11	13.48	8.82	11.76	8.1	18.95	11.98	17.31	7.62	14.2
	CG11883	0.6	0.65	1.09	1.28	0.83	1.01	0.79	0.65	0.48	0.86	0.77	0.87	0.69	0.69	0.46	0.55	0.81	0.58	0.84	0.64	0.71	1.08	0.69	0.89	0.67	0.31	0.7	0.72	0.5	0.59	0.8	0.6	0.28	0.34
4C		Adk2					Adk3
		0 h	9 h Uninf	9 h INF	18 h Uninf	18 h INF	0 h	9 h Uninf	9 h INF	18 h Uninf	18 h INF
		17.911	16.0308	12.7531	18.6716	10.0988	0.854278	0.802614	7.74238	2.76915	17.3811
			13.7318	12.6358	12.2619	9.08054	0.945693	1.22217	7.92335	3.32751	27.527
		14.7855	14.8883	15.1661	12.1772	9.70982	0.844466	1.67727	7.60059	3.27791	15.0613
		16.1797	15.4848	15.3423	18.2874	9.29279	0.970037	1.53984	7.6889	3.49698	15.2716
		16.1423	13.9235	11.388	17.7053	8.6305	1.34983	0.769919	7.32474	3.21788	20.4795
		17.2212	19.6907	13.2028	9.08054	8.08984	1.11944	0.983578	8.51168	1.777	18.0356
4D		Ak1					Ak2
		0 h	9 h Uninf	9 h INF	18 h Uninf	18 h INF	0 h	9 h Uninf	9 h INF	18 h Uninf	18 h INF
		0.924094	0.618185	7.04261	9.73228	87.7977	78.0383	77.6786	63.6804	75.3801	56.3409
		1.20534	0.890556	6.67813	15.7736	83.0617	125.028	75.0325	68.0935	59.0055	60.2453
		0.786096	2.86681	6.88176	16.1051	100.853	77.3204	75.7292	65.0185	65.3196	56.4712
		1.01826	3.11546	5.36202	12.7679	76.08	70.6578	73.4884	66.0786	70.9851	48.5964
		1.55055	0.79707	5.68087	11.9266	130.338	75.2061	70.0078	55.6938	73.6584	52.5679
		0.723356	0.757567	6.34716	5.1436	104.169	75.7292	83.6394	56.9956	72.6443	69.2037
4E		Uninf	INF
		613829	2149295
		1714452	1265256
		304279	1735970
		509826	1564906
		563079	582933
		1477958	4395408
		777157	1934441
		1240443	1889467
		681371	1480435
		511265	1446418
4F		Uninf	INF
		14628104	52146256
		17485958	54487143
		7926905	40049741
		8853614	38767008
		11224006	26182792
		21224509	31427098
		25071456	36013491
		23858354	54658757
		11056293	34063829
		15576346	56917129
4G		Uninf	INF
		6028465	15062847
		5184357	13354034
		4814998	10833732
		4279245	9782980
		3674190	10769455
		4716300	8349896
		3142555	8408079
		5547277	8138041
		4176535	6334858
		2595228	10571864
4H		Uninf	Inf
		3052869	5319110
		955655	4873544
		2678011	6003305
		1865848	3653770
		1011318	6082343
		1582947	989713
		245768	3094494
		1601608	2019647
		1624207	1548725
		316742	2637755
4I		Uninf	INF
		4.46	1.69
		5.02	2.05
		5.45	3.83
		4.86
		2.63	4.25
		4.77	2.25
		7.81	2.57
		3.58	3.29
		5.76	1.07
4J		Uninf	INF
		5.62
		7.18	2.78
		8.03	4.47
		4.73
			4.497
		6.582	3.263
		7.497	3.458
		6.969	3.752
		6.094	2.279
4K		Uninf	INF
		0.03	0.52
		0.05	0.57
		0.04	1.36
		0.13
		0.015	0.108
		0.059	0.131
		0.032	0.463
		0.007	0.475
		0.08	0.089
4L		Uninf	INF
		119017401	363383629
		206925003	147540911
		102177226	11789208
		137148933	263120698
		183746931	193153939
		88122631	107352447
		23753853	93544243
		126740944	57111539
		200906796	121016716
		101739932	406134701
