# Supplementary material for: SAM transmethylation pathway and adenosine recycling to ATP are essential for systemic regulation and immune response
Source: eLife. 2025 Apr 7;13:RP105039. doi: 10.7554/eLife.105039 (PMC11975374; doi:10.7554/eLife.105039)
Supplement: Figure 5—figure supplement 1—source data 1. [file elife-105039-fig5-figsupp1-data1.xlsx]

## Sheet: Fig5-S1
F5S1A	control			Adk3-RNAi
	0 h	18 h Uninf	18 h INF	0 h	18 h Uninf	18 h INF
	0.776289	0.83586	14.9078	1.22944	0.294159	1.93366
	1.85061	0.50278	17.5249	0.683652	0.341826	1.59992
	0.763835	1.14182	22.5439	0.435678	0.249654	2.36417
	0.6805	1.32073	23.3929	0.186597	0.165856	1.96065
	1.33916	1.01724	20.6014	1.38319	0.506277	0.734415
F5S1B	control			Ak1-RNAi
	0 h	18 h Uninf	18 h INF	0 h	18 h Uninf	18 h INF
	1.50525	0.512871	32.3718	3.10947	0.713672	6.63456
	0.791869	0.866537	32	0.950439	2.38943	7.04533
	1.34102	5.5661	62.5382	0.713672	2.65737	8.87656
	0.689362	2.84153	57.4141	0.766664	0.833161	8.43663
	0.907519	1.02811	19.2484	0.963707	2.12383	10.9536
