# Supplementary material for: SAM transmethylation pathway and adenosine recycling to ATP are essential for systemic regulation and immune response
Source: eLife. 2025 Apr 7;13:RP105039. doi: 10.7554/eLife.105039 (PMC11975374; doi:10.7554/eLife.105039)
Supplement: Figure 5—source data 1. [file elife-105039-fig5-data1.xlsx]

## Sheet: Fig5
PANEL
5A	Control		Adk3-RNAi
	Uninf	INF	Uninf	INF
	14628104	52146256	6688626	19156957
	17485958	54487143	11056738	31175173
	7926905	40049741	6061985	29656601
	8853614	38767008	9108917	22272947
	11224006	26182792	15084306	15104933
	21224509	31427098
	25071456	36013491
	23858354	54658757
	11056293	34063829
	15576346	56917129
5B	Control		Adk3-RNAi		Ak1-RNAi
	Uninf	INF	Uninf	INF	Uninf	INF
	31	169	67	88	113	114
	46		75	90	46	84
	87	153	80	79	49	57
	50	95		106
	92	109	82	112
5C		Control						Adk3-RNAi
	h AEL	Uninf			INF			Uninf			INF
	72	0	0	0	0	0	0	0	0	0	0	0	0
	78	0	0	0	0	0	0	0	0	0	0	0	0
	84	0	0	0	0	0	0	0	0	0	0	0	0
	90	0	0	0	0	0	0	0	0	0	0	0	0
	96	0	0	0	0	0	0	0	0	0	0	0	0
	102	0	0	0	0	0	0	0	0	0	0	0	0
	108	0	0	0	0	0	0	0	0	0	0	0	0
	114	0	0	0	0	1	0	0	0	0	0	0	0
	120	6	12	2	0	7	0	13	13	13	0	1	5
	126	62	78	54	12	30	6	70	60	64	13	20	19
	132	86	87	81	32	49	29	88	88	85	53	56	36
	138	96	94	90	63	73	42	90	92	97	75	82	57
	144	97	96	94	81	87	69	93	96	98	90	95	83
	150	97	96	94	92	94	99	94	96	98	90	97	92
5D	Control	Adk3-RNAi
	5400	1050
	4050	1200
	10200	3600
	2100	1950
	5700	0
	3300	3750
	3900	4050
	1050	2250
	5250	3900
	3000	2400
	4950	4350
	5400	1800
	4525	2525
	3300	2400
	2400	1350
	2700	4500
	1800	2400
	9150	0
	4500	2850
	3150	3000
	4800	1650
	4500	4800
	5250	2850
	8700	4950
	2400	1800
	600	600
	600	150
	1200	1500
	0	1350
	150	750
	1200	1950
	2400	1050
	3150	150
	4500	1050
	1650	750
	1500	450
	1050	600
	600
	6750
	600
	0
	1800
	0
	2100
	0
	750
	3900
	2550
	900
	5700
	1050
	4950
	1050
	1200
	1650
	4800
	1050
	1800
	1200
	1350
	14700
	2850
	6450
	300
	900
	600
	1950
	8250
	1650
	4350
	0
	8250
	1500
	8100
	4350
	6750
	1500
	4200
	2100
	4500
	1800
	4650
	5250
	6750
	150
	2100
	0
	5250
	1200
	600
	1950
	8250
	1650
	4350
	0
	8250
	1500
	8100
	4350
	6750
	1500
	5700
	3450
	6600
	5400
	2400
	450
	750
	10800
	450
	3600
	24750
	4050
	8400
	1650
	7500
	2100
5E	Control	Adk3-RNAi
	8.11	7.14
	8.33	11.11
	10.81	3.57
	4.17	0
	25	0
	3.33	5.56
	18.75	3.57
	8.57	11.54
	16	15.38
	24.14	0
	11.11	0
	10.34	3.57
	19.35
	12.12
	10.34
	7.14
	20.69
	22.22
	23.08
	32
	25.93
5F		Control						Ak1-RNAi
	h AEL	Uninf			INF			Uninf			INF
	72	0	0	0	0	0	0	0	0	0	0	0	0
	78	0	0	0	0	0	0	0	0	0	0	0	0
	84	0	0	0	0	0	0	0	0	0	0	0	0
	90	0	0	0	0	0	0	0	0	0	0	0	0
	96	0	0	0	0	0	0	0	0	0	0	0	0
	102	0	0	0	0	0	0	0	0	0	0	0	0
	108	0	0	0	0	0	0	0	0	0	0	0	0
	114	10	9	0	0	3	0	4	7	15	5	4	1
	120	37	35	13	4	7	2	13	32	50	13	21	9
	126	60	63	71	19	31	18	57	65	70	32	43	32
	132	80	72	80	46	52	50	79	77	85	52	67	59
	138	89	83	88	58	68	68	93	98	90	67	69	81
	144	90	88	93	80	85	82	96	100	90	84	81	91
	150	90	88	95	92	91	94	96	100	90	93	93	95
5G	Control	Ak1-RNAi
	8400	2400
	3450	2250
	6600	4950
	4650	1200
	6150	3900
	2100	750
	6300	3300
	11100	1800
	12750	3900
	2700	3150
	2100	7800
	5100	1800
	1500	11100
	3600	3300
	12750	7650
	3450	1050
	10650	4050
	1800	1050
	7350	4050
	6000	600
	9900	9450
	4500	1500
	11550	2100
	8100	900
	13050	4500
	4650	2700
	9750	5550
	2250	4800
	1500	9300
	1050	3300
	4800	1500
	900	2100
	3600	300
	2250	1500
	2550	300
	750	150
	1650	1800
	2700	1950
	2850	450
	1200	900
	600	2400
	2700
	5250
	2700
	5400
	5100
	4800
	3450
	2700
	1050
	2550
	1200
	3600
	3600
	4950
	2850
	750
	750
	3150
	3000
	10350
	3300
	2700
	9900
	4800
	5400
	3600
	2550
	1200
	5400
	3750
	2100
	4950
	8700
	4950
	4800
	3450
	3150
	8700
	4950
	4800
	7200
	4500
	6300
	1950
	8850
	4350
	3150
	1050
	5400
	3150
5H	Control	Ak1-RNAi
	26	28
	26	21
	18	26
	30	17
	40	7
	52	5
	44	0
	30	8
	54	13.8
	55	27.6
	45	25
	74	61.5
	68	54.2
	67	60
	81
